# Supplementary material
Source: PubMed Central journal article supplement (PMC2924644)

**A**

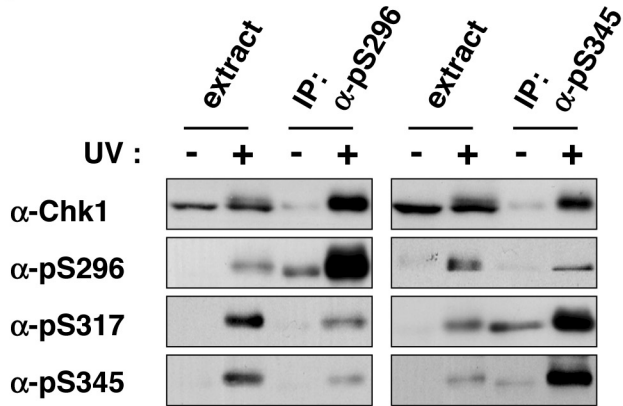

**B**

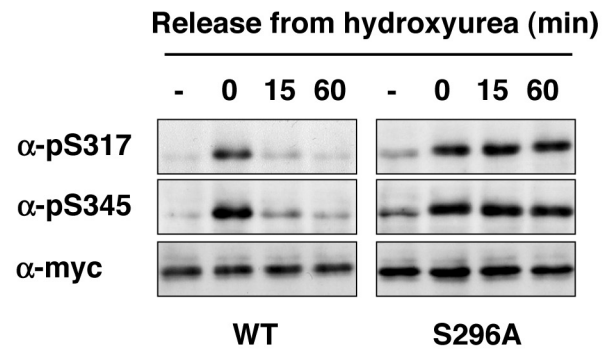

**C**

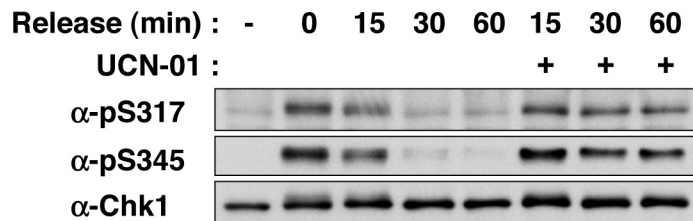

**D**

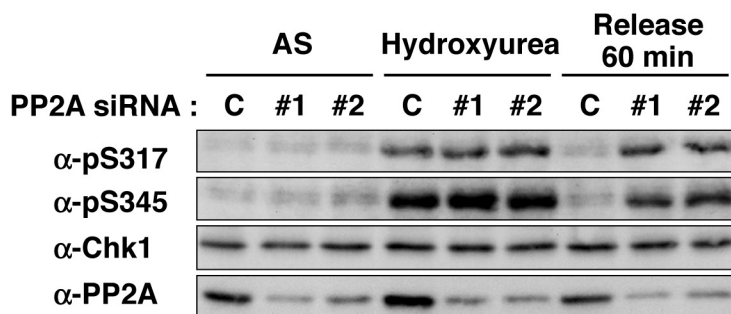

**A**

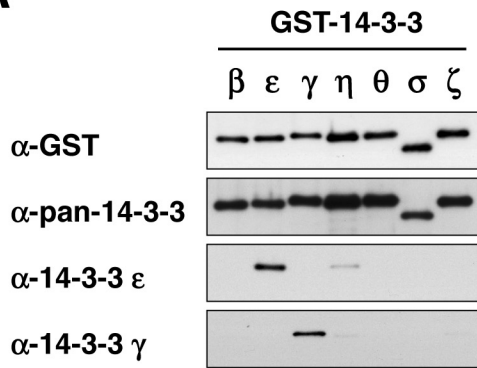

**B**

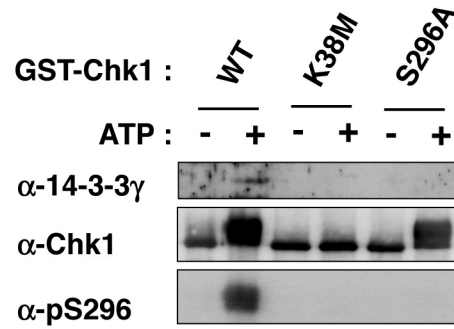

**C**

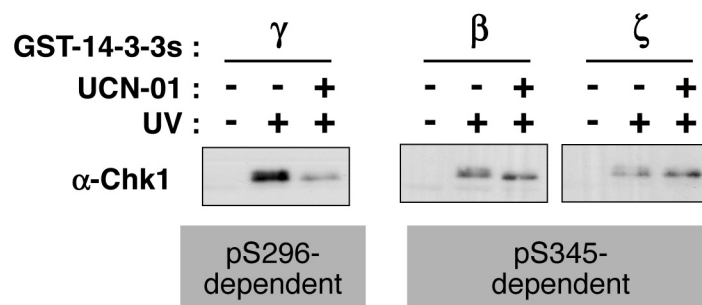

**A**

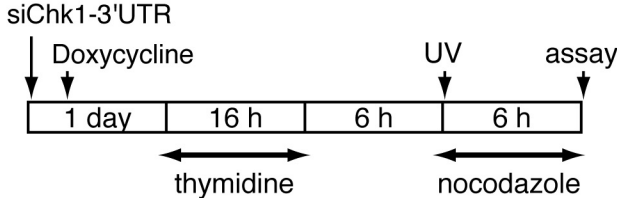

**B**

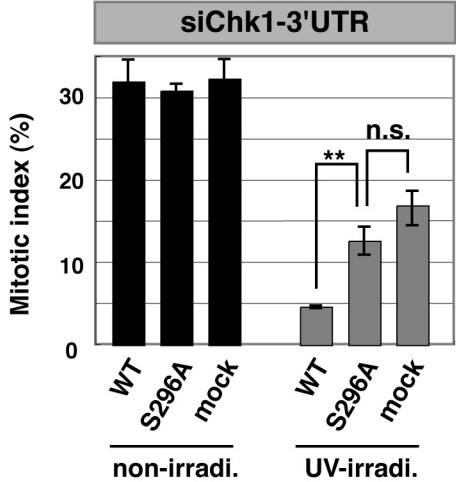

Supplementary Figure S5. Kasahara K. *et al.*

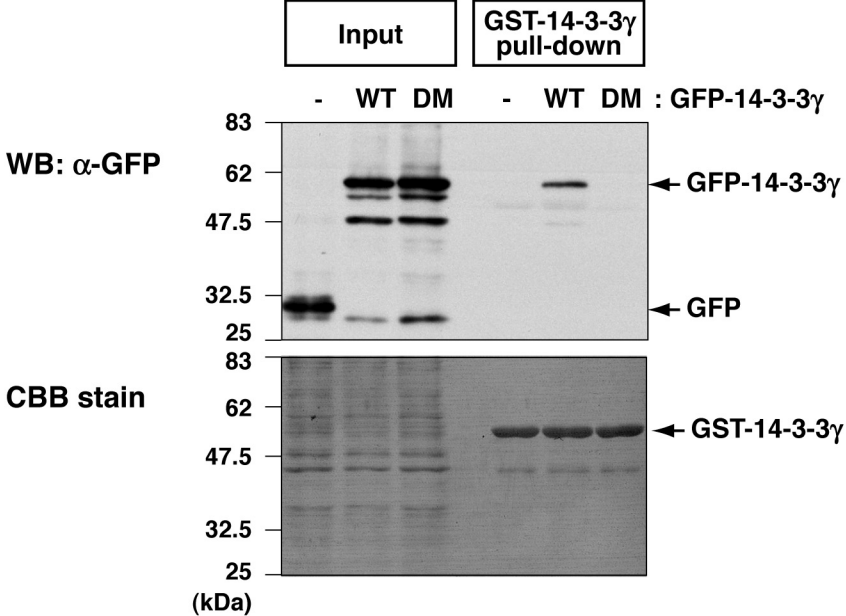

**A**

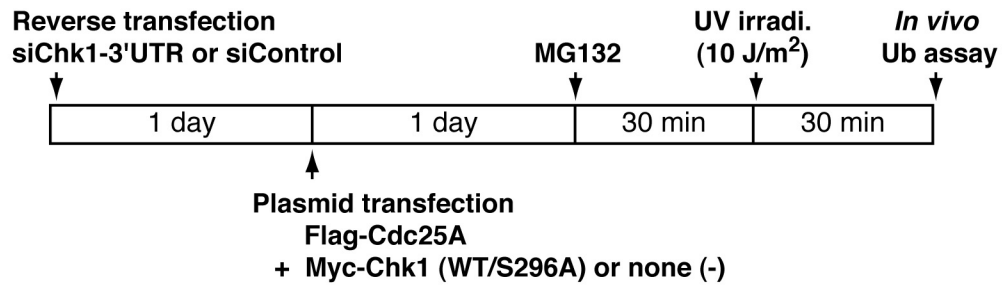

**B**

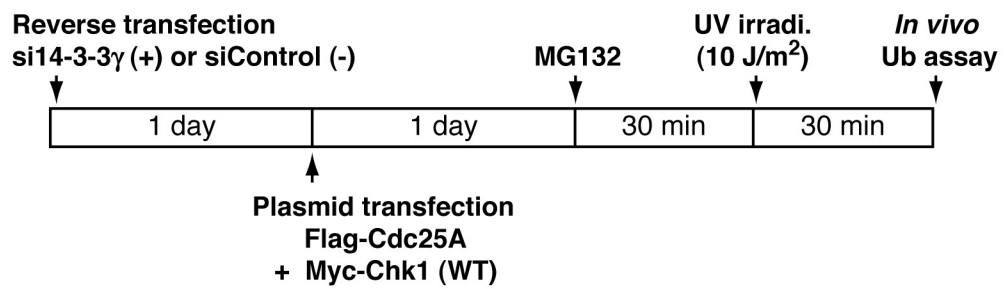

**C**

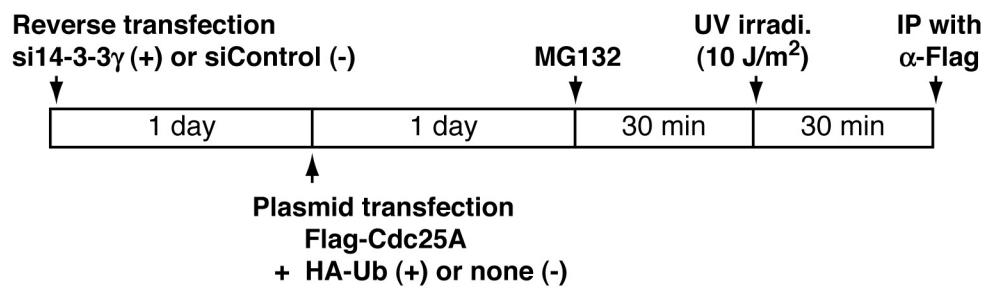

Supplement: emboj2010157s1.pdf [file emboj2010157s1.pdf]
